# Supplementary material
Source: Springer Nature journal article supplement (https://www.springermedizin.de/resource/supplementary/12891_2013_1847_MOESM2_ESM.pdf/9508584)

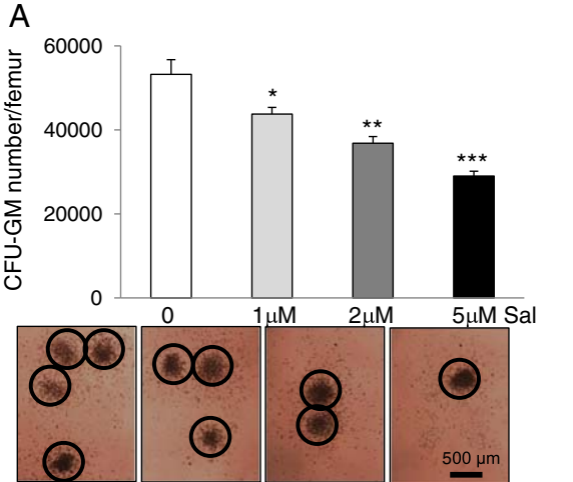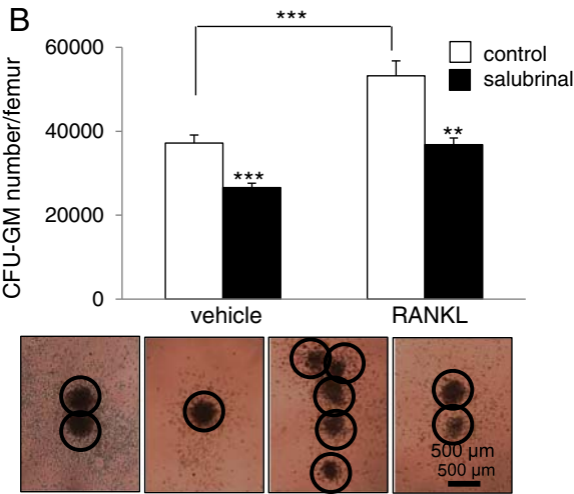

Supplement: MOESM2 [file 9508584]
